# Supplementary material for: Nanolubrication by ionic liquids: molecular dynamics simulations reveal an anomalous effective rheology
Source: Royal Society of Chemistry journal article supplement (doi:10.1039/c5cp03134f), 2015-01-01
Supplement: c5cp03134f1.pdf [file c5cp03134f1.pdf]

# Electronic Supplementary Information

## Force field validation

To model the behavior of ionic liquids (IL) by molecular dynamics (MD) simulations, Canongia Lopes *et al.*<sup>1,2</sup> built a non-polarizable all-atom force field from quantum mechanical calculations. This force field is able to describe a large set of IL compounds, but it generally fails to reproduce quantitatively their transport properties. In particular, it typically overestimates their viscosity by one order of magnitude<sup>3</sup>. As quantitative results were expected from the present study, we implemented a standard charge scaling procedure<sup>3,4</sup> in order to properly reproduce the evolution of the density and of transport properties of the [mmIm<sup>+</sup>][NTf<sub>2</sub><sup>-</sup>] ionic liquid with the temperature. This modification was conducted following the method described by Chaban<sup>5</sup>.

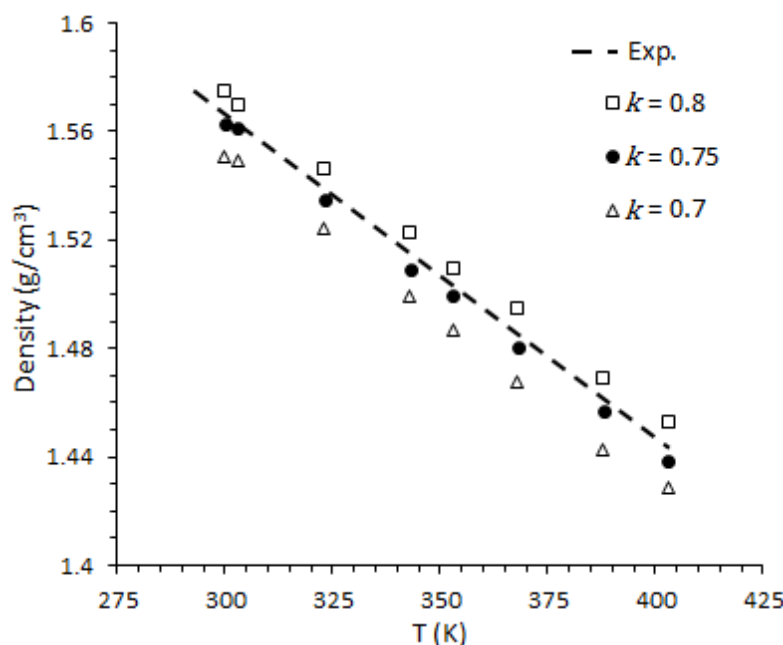

Figure 1. Evolution of the bulk ionic liquid density with temperature, at ambient pressure  $p = 0.1$  MPa. Symbols represent numerical values obtained for different weighting factors  $k$

applied to the Coulombic charges in the force field parameterization. The dashed line represents experimental results<sup>5,6</sup>.

For this purpose, we computed the [mmIm<sup>+</sup>][NTf<sub>2</sub><sup>-</sup>] IL properties from MD simulations and compared them to experimental data. Fig.1 illustrates the variation of the IL density with temperature at ambient pressure  $p = 0.1$  MPa, for both experimental data<sup>5,6</sup> and MD simulations carried out with 3 different weighting factors:  $k = 0.70$ ,  $0.75$  and  $0.80$ . The relative deviation between the computed density values and the measured ones is less than 1 % over the studied temperature range when  $k = 0.75$ . It was thus considered, for this specific  $k$  value, that density and by extension the structural properties of the [mmIm<sup>+</sup>][NTf<sub>2</sub><sup>-</sup>] ionic liquid were satisfactorily predicted.

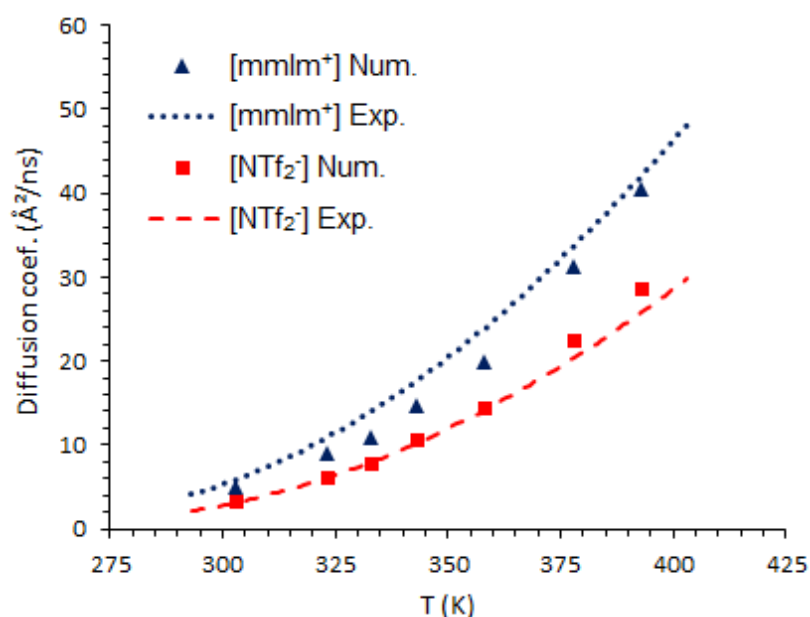

Figure 2. Bulk diffusion coefficients of [mmIm<sup>+</sup>] cations (blue triangles) and [NTf<sub>2</sub><sup>-</sup>] anions (red squares) as a function of temperature, for a weighting factor  $k = 0.75$  and at ambient pressure  $p = 0.1$  MPa. Analytical laws determined empirically from experimental data<sup>7</sup> are plotted for comparison.

As for dynamic properties, the diffusion coefficient was computed from the integration of the mean square displacement of the ions over time<sup>8</sup>. The weighting factor of 0.75 was used and

the results were compared with analytical predictions of empirical laws derived from experimental data<sup>7</sup>. Fig.2 shows the variation of the bulk diffusion coefficient of [mmlm<sup>+</sup>] cations and [NTf<sub>2</sub><sup>-</sup>] anions versus temperature, at ambient pressure  $p = 0.1$  MPa. The agreement between the two set of results is fairly satisfying: the maximum relative deviations are of ca. 20 % for the cation and ca. 10 % for the anion at 333 and 393 K, respectively.

As a last step to confirm the  $k$  value of 0.75, the bulk shear viscosity at  $T = 303$  K and  $p = 0.1$  MPa was computed through equilibrium MD simulations using a Green-Kubo expression<sup>8</sup>, still with the same weighting factor applied to the ions charges. The resulting viscosity value was equal to  $36 \pm 5$  mPa.s, to be compared with the experimental one of 32 mPa.s<sup>5</sup>, the relative deviation of 13 % being within the range of statistical errors. Finally, the choice of  $k = 0.75$  appeared to be relevant to predict both density and transport properties of the [mmlm<sup>+</sup>][NTf<sub>2</sub><sup>-</sup>]: this weighting factor has thus been adopted in this study.

## Force Field configuration

$$E_{total} = E_{intermolecular} + E_{bonds} + E_{angles}$$

$$E_{intermolecular} = \sum 4\epsilon_{ij} \left( \left( \frac{\sigma_{ij}}{r_{ij}} \right)^{12} - \left( \frac{\sigma_{ij}}{r_{ij}} \right)^6 \right) + \frac{1}{4\pi\epsilon_0} \frac{q_i q_j}{r_{ij}}$$

For  $r_{ij} < 12 \text{ \AA}$ <sup>a</sup> and using Lorentz-Berthelot mixing rules for Lennard Jones coefficients. Within molecules, intermolecular interactions are weighted with the following factors:

- 0 for 1-bond separated atom
- 0 for 2-bonds separated atom
- 0.5 for more than 3-bonds separated atom

$$E_{bonds} = \sum_{bonds} K_b(r$$

$$E_{angles} = \sum_{angles} K_a(\theta$$

$$E_{dihedrals} = \sum_{dihedrals} \frac{1}{2} V_1 [1 + \cos(\phi)] + \frac{1}{2} V_2 [1 - \cos(2\phi)] + \frac{1}{2} V_3 [1 + \cos(3\phi)]$$

## Coefficients

### Iron(II) oxide [FeO]

| L J + Coulomb | Mass (g/mol) | $\sigma_{ij}$ (Å) | $\epsilon_{ij}$ (kcal/mol) | $q_i$ (e) |
|---------------|--------------|-------------------|----------------------------|-----------|
| Fe            | 55.845       | 4.9059            | 9.0298E-06                 | 2         |
| O             | 15.999       | 3.166             | 0.1554                     | -2        |

<sup>a</sup> Beyond 12 Å the Coulombic interactions are still effective but using a particle-particle particle-mesh solver<sup>9</sup>

## 1,3-dymethylimidazolium [mmIm<sup>+</sup>]

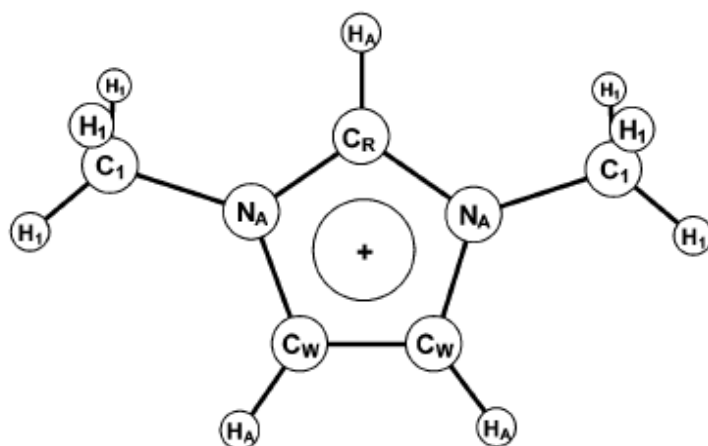

| L J + Coulomb  | Mass (g/mol) | $\sigma_{ij}$ (Å) | $\epsilon_{ij}$ (kcal/mol) | $q_i$ (e) |
|----------------|--------------|-------------------|----------------------------|-----------|
| N <sub>A</sub> | 14.0067      | 3.25              | 0.17                       | 0.1125    |
| C <sub>R</sub> | 12.011       | 3.55              | 0.07                       | -0.0825   |
| C <sub>W</sub> | 12.011       | 3.55              | 0.07                       | -0.0975   |
| C <sub>1</sub> | 12.011       | 3.5               | 0.065999                   | -0.1275   |
| H <sub>A</sub> | 1.008        | 2.5               | 0.03                       | 0.1575    |
| H <sub>1</sub> | 1.008        | 2.5               | 0.03                       | 0.0975    |

| Bonds                          | $r_0$ (Å) | $K_b$ (kcal/mol)        |
|--------------------------------|-----------|-------------------------|
| C <sub>R</sub> -N              | 1.315     | 477.0555                |
| C <sub>W</sub> -N              | 1.378     | 427.1033                |
| C <sub>1</sub> -N              | 1.466     | 336.9981                |
| C <sub>R</sub> -H              | 1.08      | 339.762926 <sup>b</sup> |
| C <sub>W</sub> -H              | 1.08      | 339.762926 <sup>b</sup> |
| C <sub>W</sub> -C <sub>W</sub> | 1.341     | 520.076481              |
| C <sub>1</sub> -H              | 1.09      | 339.762926              |

<sup>b</sup> Coefficient values taken from the AMBER96 force field<sup>10</sup>

| Angles                            | $\theta_0$ (°) | $K_a$ (kcal/mol) |
|-----------------------------------|----------------|------------------|
| C <sub>W</sub> -N-C <sub>R</sub>  | 108            | 69.93308         |
| C <sub>R</sub> -N-C <sub>1</sub>  | 126.4          | 69.93308         |
| C <sub>W</sub> -N-C <sub>1</sub>  | 125.6          | 69.93308         |
| N-C <sub>R</sub> -N               | 109.8          | 69.93308         |
| N-C <sub>R</sub> -H               | 125.1          | 34.96653         |
| N-C <sub>W</sub> -H               | 122            | 34.96653         |
| N-C <sub>W</sub> -C <sub>W</sub>  | 107.1          | 69.93308         |
| C <sub>W</sub> -C <sub>W</sub> -H | 130.9          | 34.96653         |
| N-C <sub>1</sub> -H               | 110.7          | 74.8566          |
| H-C <sub>1</sub> -H               | 107.8          | 65.98948         |

| Dihedrals                                        | $V_1$ (kcal/mol) | $V_2$ (kcal/mol) | $V_3$ (kcal/mol) |
|--------------------------------------------------|------------------|------------------|------------------|
| N-C <sub>R</sub> -N-C <sub>W</sub>               | 0                | 4.651            | 0                |
| H-C <sub>R</sub> -N-C <sub>1</sub>               | 0                | 4.651            | 0                |
| C <sub>R</sub> -N-C <sub>W</sub> -C <sub>W</sub> | 0                | 3                | 0                |
| C <sub>W</sub> -N-C <sub>1</sub> -H              | 0                | 3                | 0                |
| C <sub>R</sub> -N-C <sub>1</sub> -H              | 0                | 0                | 0                |
| N-C <sub>R</sub> -N-C <sub>1</sub>               | 0                | 4.651            | 0                |
| H-C <sub>R</sub> -N-C <sub>1</sub>               | 0                | 4.651            | 0                |
| C <sub>1</sub> -N-C <sub>W</sub> -C <sub>W</sub> | 0                | 3                | 0                |
| C <sub>1</sub> -N-C <sub>W</sub> -H              | 0                | 3                | 0                |
| C <sub>W</sub> -N-C <sub>1</sub> -H              | 0                | 0                | 0.1314           |
| N-C <sub>W</sub> -C <sub>W</sub> -N              | 0                | 10.75            | 0                |
| N-C <sub>W</sub> -C <sub>W</sub> -H              | 0                | 10.75            | 0                |
| H-C <sub>W</sub> -C <sub>W</sub> -H              | 0                | 10.75            | 0                |

| Improper dihedrals | $V_1$ (kcal/mol) | $V_2$ (kcal/mol) | $V_3$ (kcal/mol) |
|--------------------|------------------|------------------|------------------|
| N                  | 0                | 2.0004           | 0                |
| C <sub>R/W</sub>   | 0                | 2.1988           | 0                |

## Bis(trifluoromethylsulfonyl)imide [NTf<sub>2</sub><sup>-</sup>]

| L J + Coulomb | Mass (g/mol) | $\sigma_{ij}$ (Å) | $\epsilon_{ij}$ (kcal/mol) | $q_i$ (e) |
|---------------|--------------|-------------------|----------------------------|-----------|
| O             | 15.9994      | 2.96              | 0.21                       | -0.3975   |
| S             | 32.065       | 3.55              | 0.25                       | 0.765     |
| F             | 18.998       | 2.95              | 0.053                      | -0.12     |
| N             | 14.0067      | 3.25              | 0.17                       | -0.495    |
| C             | 12.0107      | 3.5               | 0.066                      | 0.2625    |

| Bonds | $r_0$ (Å) | $K_b$ (kcal/mol) |
|-------|-----------|------------------|
| O-S   | 1.442     | 637.0545         |
| N-S   | 1.57      | 372.0035         |
| S-C   | 1.818     | 235.415          |
| C-F   | 1.323     | 441.7915         |

| Angles | $\theta_0$ (°) | $K_a$ (kcal/mol) |
|--------|----------------|------------------|
| O-S-O  | 118.5          | 115.7955         |
| O-S-N  | 113.6          | 94.2855          |
| O-S-C  | 102.6          | 103.965          |
| N-S-C  | 100.2          | 97.512           |
| S-N-S  | 125.6          | 80.1845          |
| S-C-F  | 111.8          | 82.933           |
| F-C-F  | 107.1          | 93.3295          |

| Dihedrals | $V_1$ (kcal/mol) | $V_2$ (kcal/mol) | $V_3$ (kcal/mol) |
|-----------|------------------|------------------|------------------|
| O-S-N-S   | 0                | 0                | -0.003585        |
| O-S-C-F   | 0                | 4.651            | 0.34679          |
| C-S-N-S   | 7.83294          | -2.49044         | -0.76362         |
| N-S-C-F   | 0                | 0                | 0.31596          |

## References

- (1) Canongia Lopes, J. N.; Pádua, A. A. H. Molecular Force Field for Ionic Liquids Composed of Triflate or Bistriflylimide Anions. *J. Phys. Chem. B* **2004**, *108*, 16893–16898.
- (2) Canongia Lopes, J. N.; Deschamps, J.; Pádua, A. A. H. Modeling Ionic Liquids Using a Systematic All-Atom Force Field. *J. Phys. Chem. B* **2004**, *108*, 2038–2047.
- (3) Salanne, M. Simulations of Room Temperature Ionic Liquids: From Polarizable to Coarse-Grained Force Fields. *Phys. Chem. Chem. Phys.* **2015**, *17*, 14270–14279.
- (4) Schroder, C. Comparing Reduced Partial Charge Models with Polarizable Simulations of Ionic Liquids. *Phys. Chem. Chem. Phys.* **2012**, *14*, 3089–3102.
- (5) Chaban, V. Polarizability versus Mobility: Atomistic Force Field for Ionic Liquids. *Phys. Chem. Chem. Phys.* **2011**, *13*, 16055–16062.
- (6) Krummen, M.; Wasserscheid, P.; Gmehling, J. Measurement of Activity Coefficients at Infinite Dilution in Ionic Liquids Using the Dilutor Technique. *J. Chem. Eng. Data* **2002**, *47*, 1411–1417.
- (7) Tokuda, H.; Hayamizu, K.; Ishii, K.; Susan, M. A. B. H.; Watanabe, M. Physicochemical Properties and Structures of Room Temperature Ionic Liquids. 2. Variation of Alkyl Chain Length in Imidazolium Cation. *J. Phys. Chem. B* **2005**, *109*, 6103–6110.
- (8) Allen, M. P.; Tildesley, D. J. *Computer Simulation of Liquids*; Oxford university press, 1989.
- (9) Hockney, R. W.; Eastwood, J. W. *Computer Simulation Using Particles*; CRC Press, 1988.
- (10) Kollman, P. A. Advances and Continuing Challenges in Achieving Realistic and Predictive Simulations of the Properties of Organic and Biological Molecules. *Acc. Chem. Res.* **1996**, *29*, 461–469.
